# Supplementary material for: Thermal hysteresis of stress and strain in spin-crossover@polymer composites: towards a rational design of actuator devices
Source: Royal Society of Chemistry journal article supplement (doi:10.1039/d2ma00459c), 2022-01-01
Supplement: d2ma00459c1.pdf [file d2ma00459c1.pdf]

## SUPPORTING INFORMATION

### **Thermal hysteresis of stress and strain in spin-crossover@polymer composites: towards a rational design of actuator devices**

José Elias Angulo Cervera, Mario Piedrahita-Bello, Baptiste Martin, Seyed Ehsan Alavi, William Nicolazzi, Lionel Salmon, Gábor Molnár,\* Azzedine Bousseksou\*

*LCC, CNRS & University of Toulouse, 205 route de Narbonne, 31077 Toulouse, France.*  
[azzedine.bousseksou@lcc-toulouse.fr](mailto:azzedine.bousseksou@lcc-toulouse.fr), [gabor.molnar@lcc-toulouse.fr](mailto:gabor.molnar@lcc-toulouse.fr)

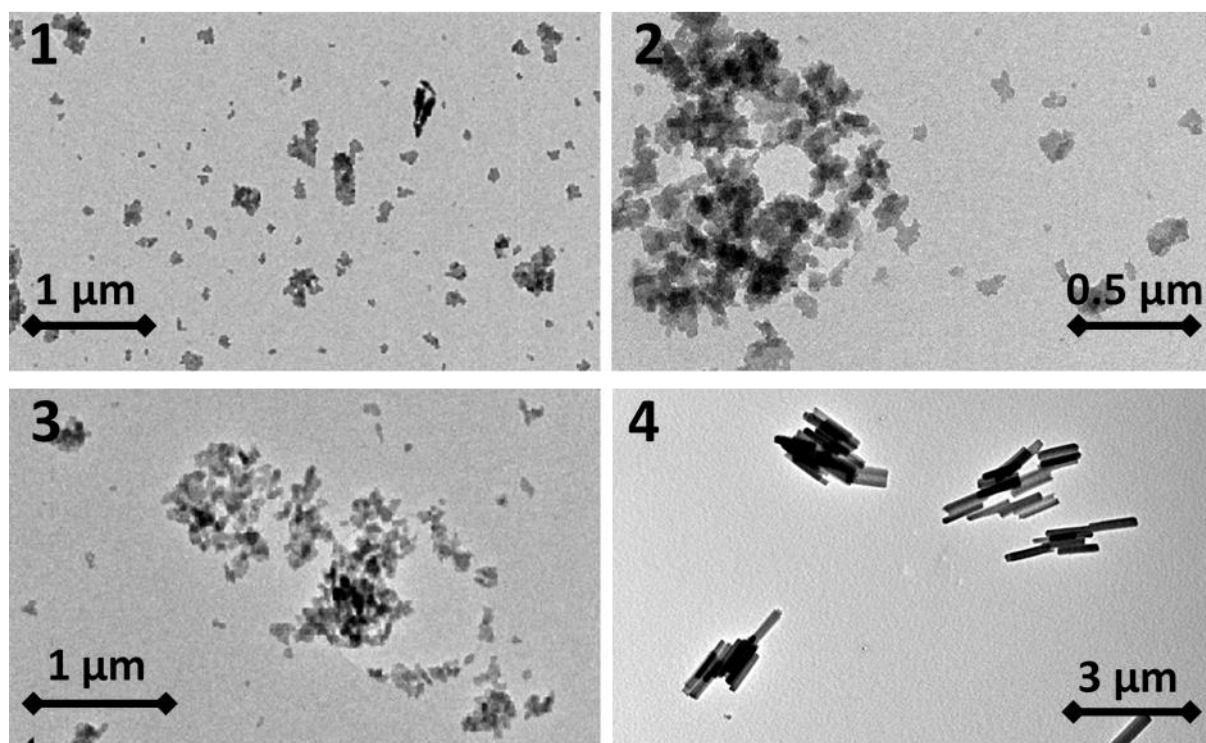

Fig. S1. Representative TEM images of the spin-crossover particles (1-4) used in the composites

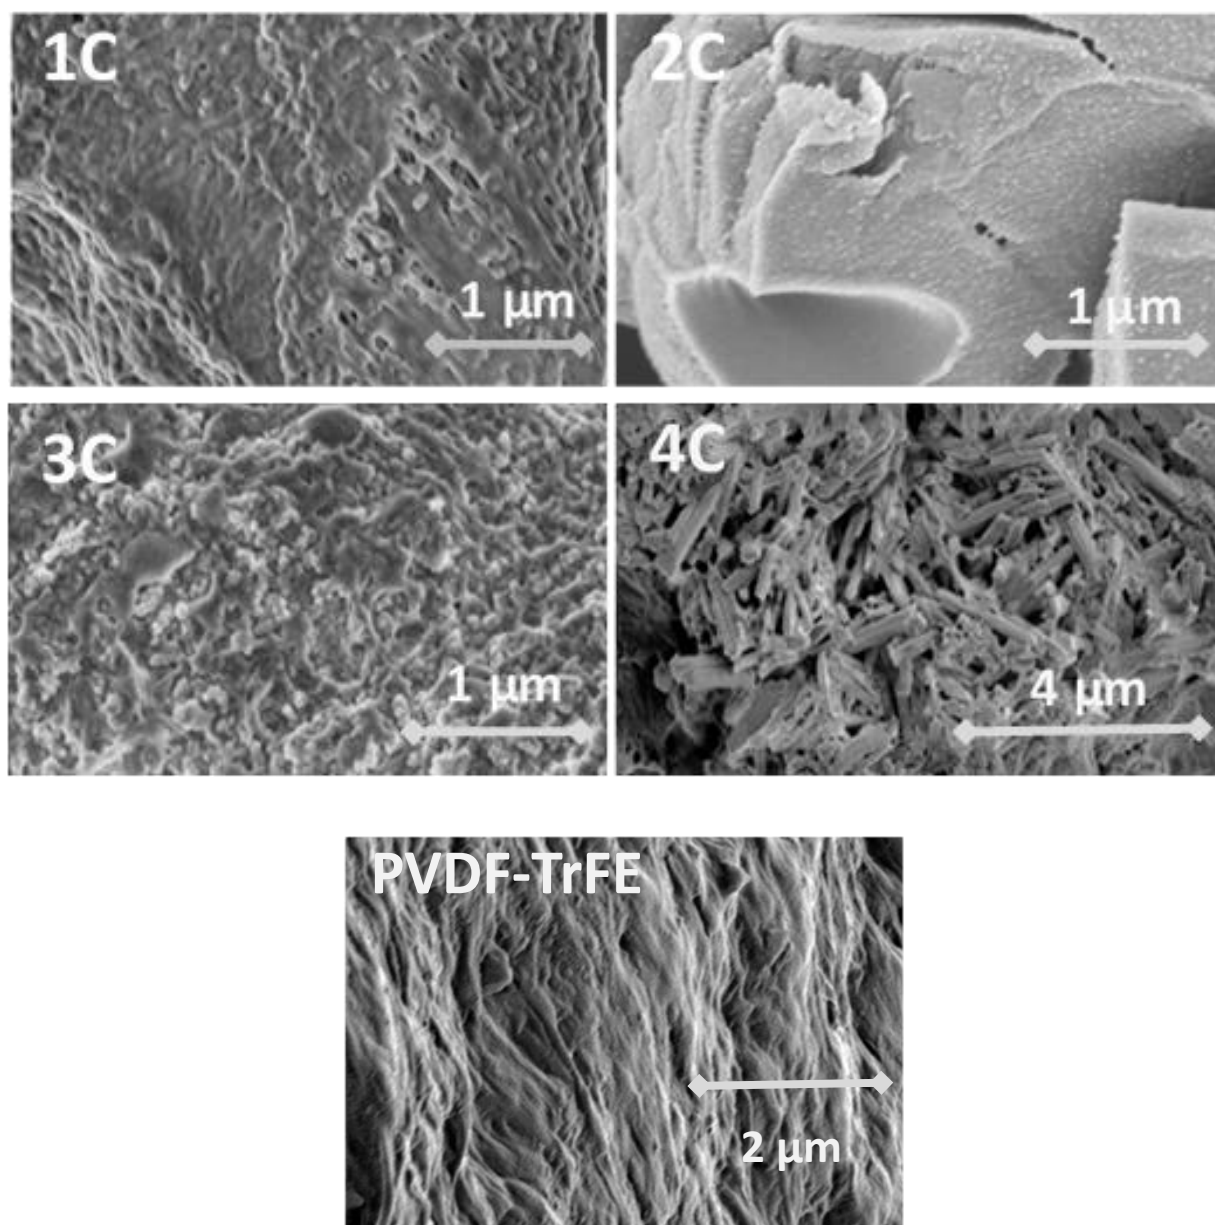

Fig. S2. Representative SEM images of the composite cross-sections (1C-4C) and that of the pure copolymer.

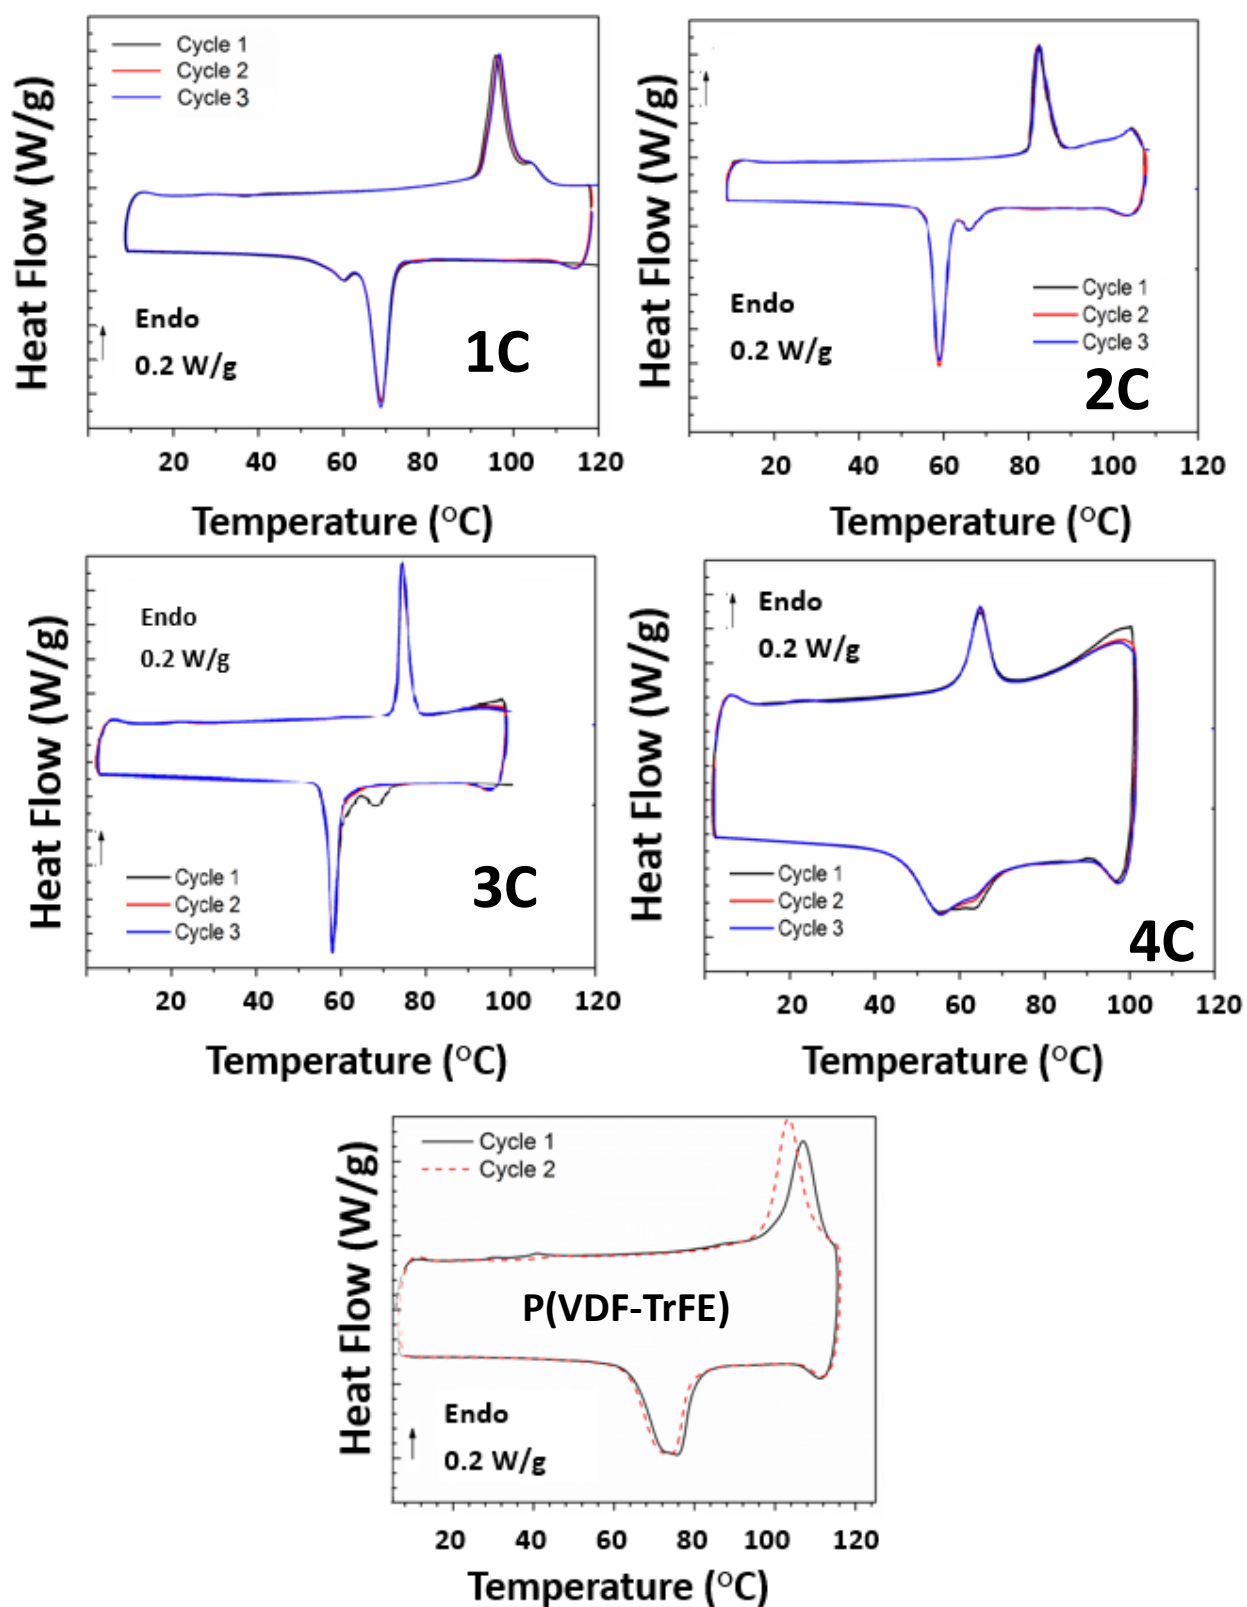

Fig. S3. DSC thermograms of the composites (1C-4C) and that of the pure copolymer recorded for three successive heating-cooling cycles (two for the pure copolymer).

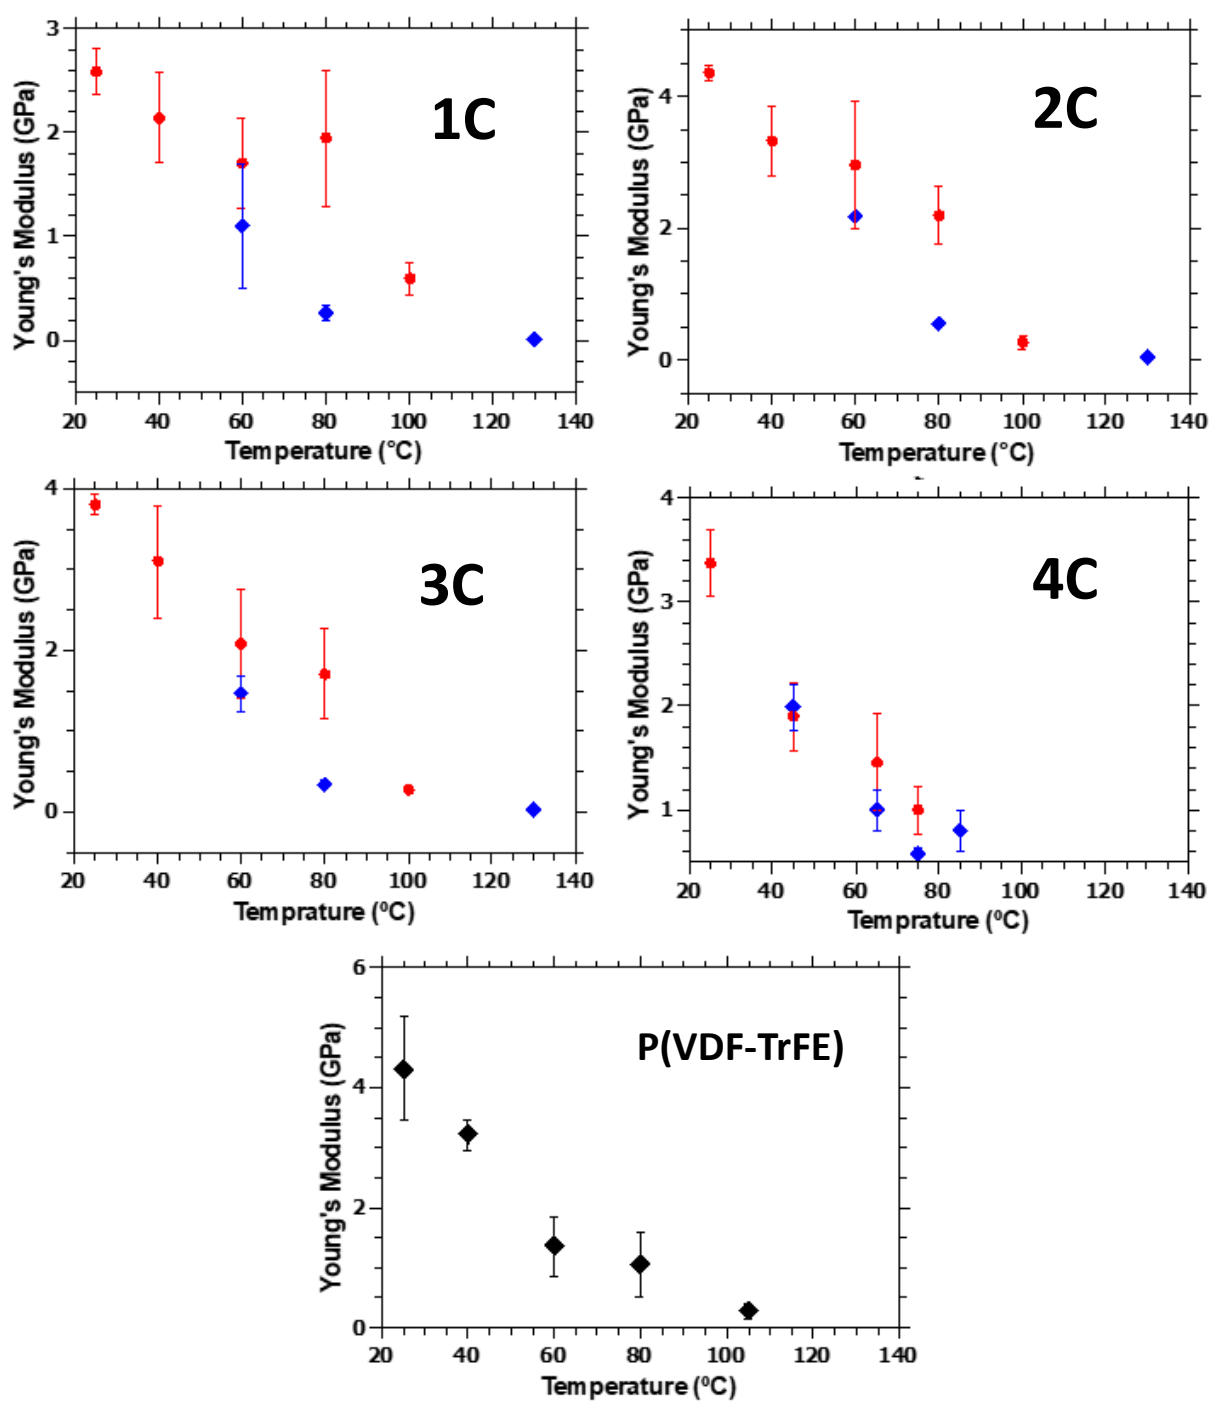

Fig. S4. Young's modulus of the composites (1C-4C) and that of the pure copolymer measured at different temperatures on heating (red) and cooling (blue).

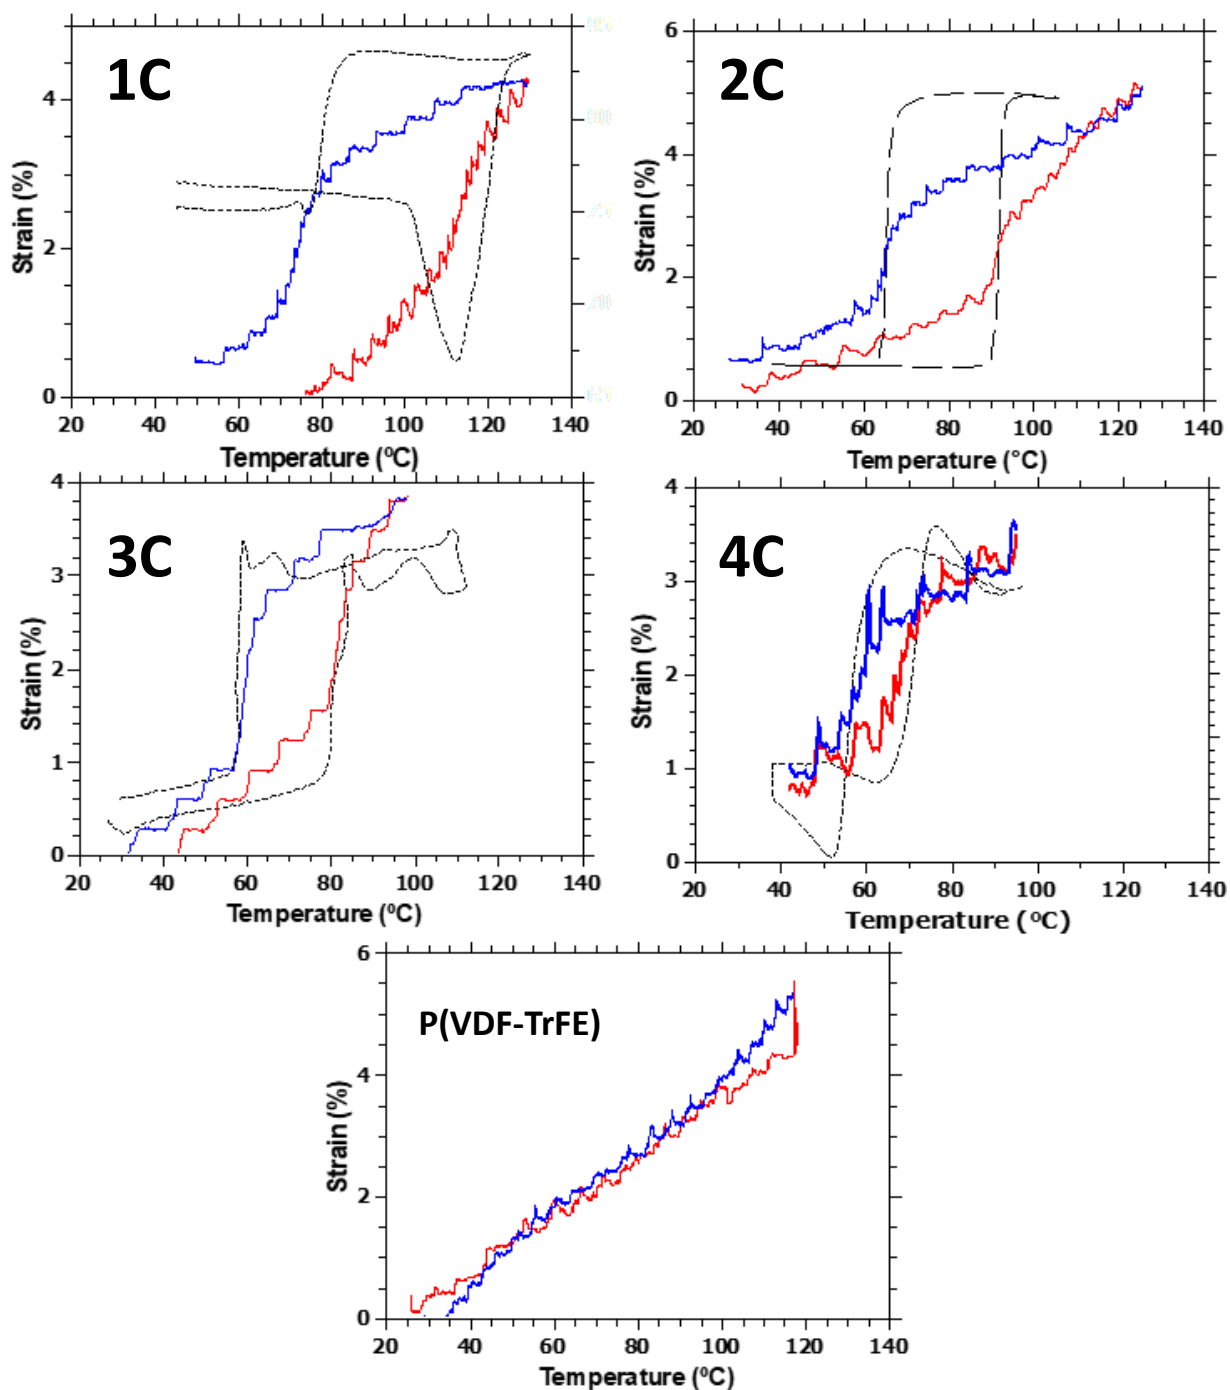

Fig. S5. Representative strain vs. temperature curves of the composites (**1C-4C**) and that of the pure copolymer measured on heating (red) and cooling (blue) under a constant uniaxial tensile force. The dotted lines corresponds to a simultaneous optical reflectivity tracking (arb. units) of the color change (i.e. the SCO) in the composite.

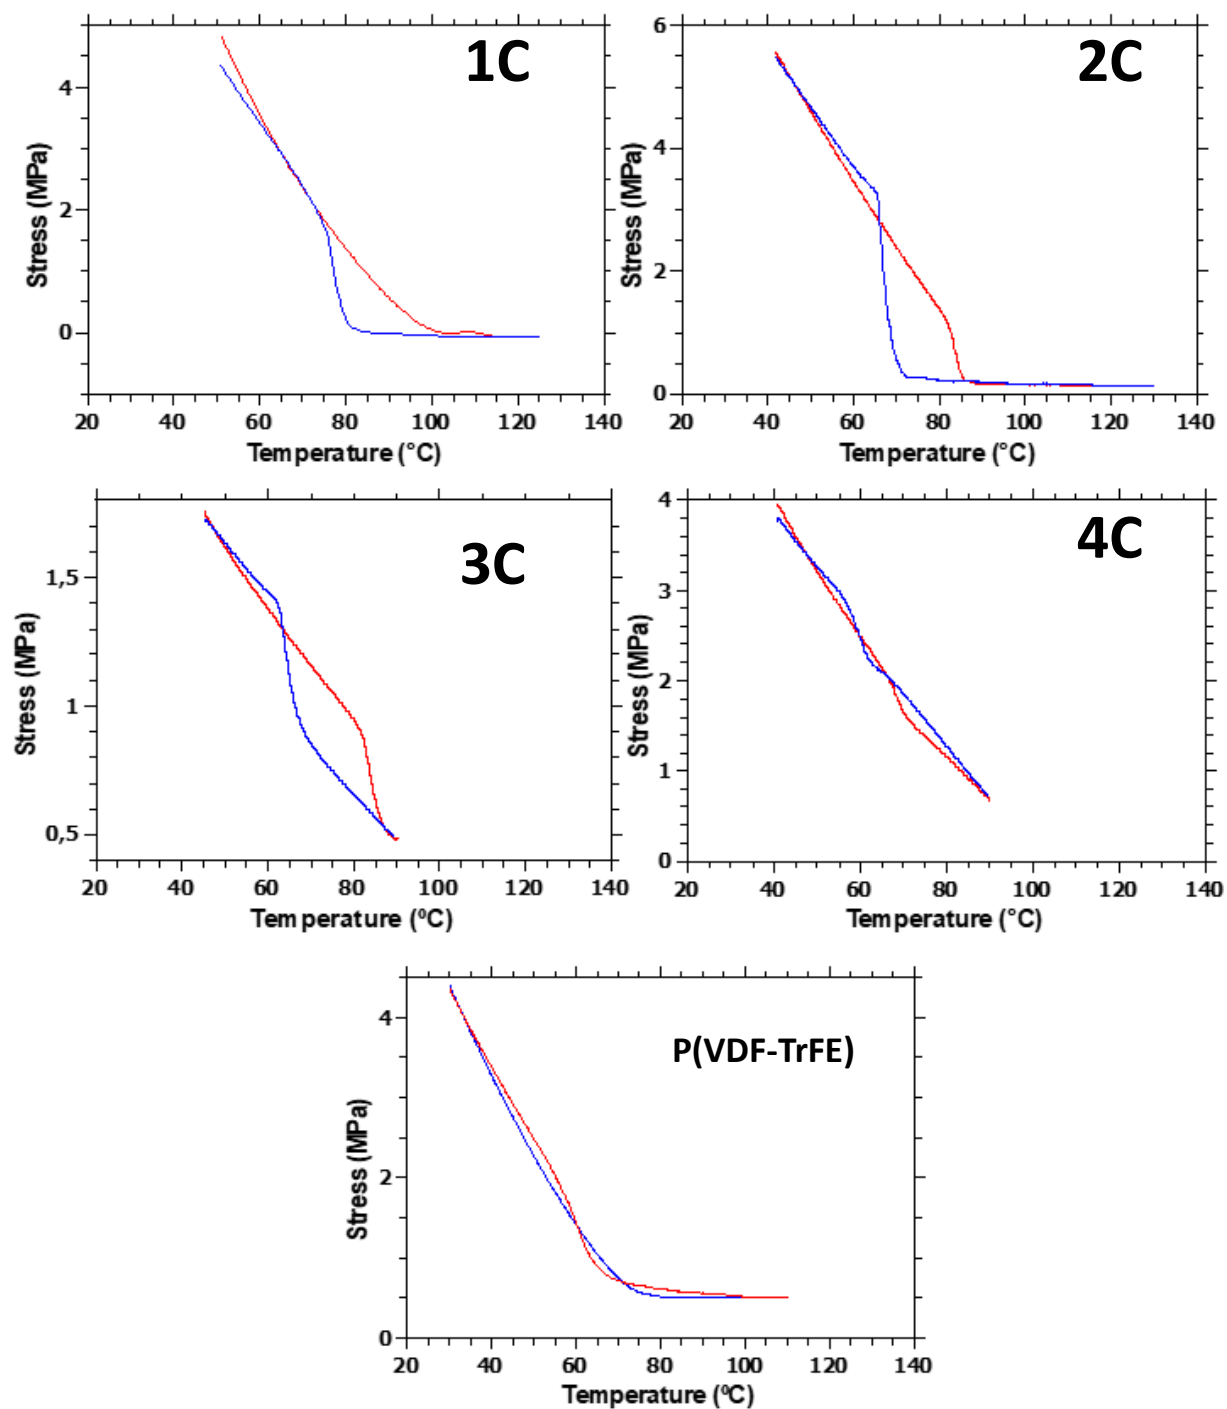

Fig. S6. Representative stress vs. temperature curves of the composites (**1C-4C**) and that of the pure copolymer measured on heating (red) and cooling (blue) under a constant uniaxial tensile strain.
